# Supplementary material
Source: Springer Nature journal article supplement (https://www.springermedizin.de/resource/supplementary/13058_2007_2162_MOESM8_ESM.pdf/9700776)

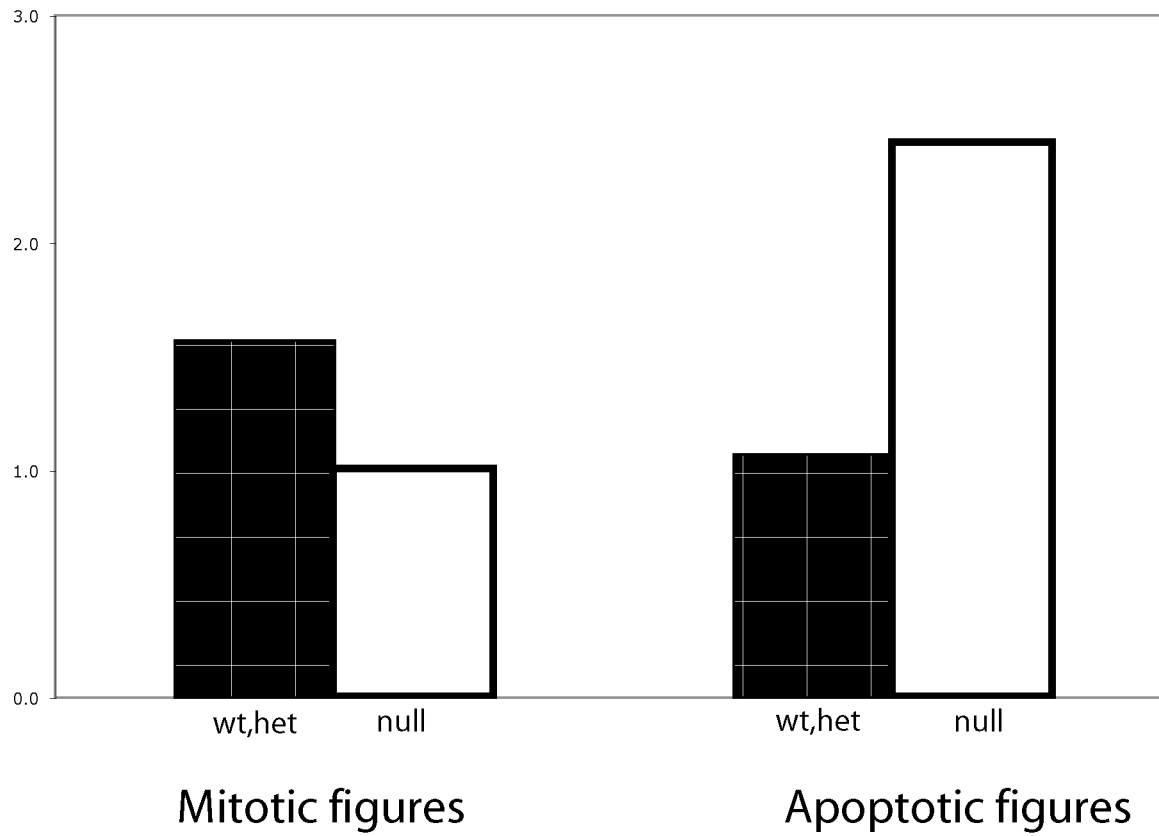

fig 5b

Supplement: MOESM8 [file 9700776]
